# Supplementary material for: Association of SCN10A Polymorphisms with the Recurrence of Atrial Fibrillation after Catheter Ablation in a Chinese Han Population
Source: PubMed Central journal article supplement (PMC5345091; doi:10.1038/srep44003), 2017-03-10
Supplement: srep44003-s1.pdf [file srep44003-s1.pdf]

## Supplementary Tables

### **Association of *SCN10A* Polymorphisms with the Recurrence of Atrial Fibrillation after Catheter Ablation in a Chinese Han Population**

Haiqing Wu<sup>1+</sup>, Juan Xu<sup>1+</sup>, Songwen Chen<sup>1+</sup>, Liqun Zhao<sup>1+</sup>, Genqing Zhou<sup>1</sup>, Baozhen Qi<sup>2</sup>, Yong Wei<sup>3</sup>, En Hu<sup>1</sup>, Dongdong Tang<sup>1</sup>, Gang Chen<sup>1</sup>, Hongli Li<sup>1</sup>, Yongyong Shi<sup>4\*</sup>,  
Shaowen Liu<sup>1\*</sup>

<sup>1</sup>Department of Cardiology, Shanghai First People's Hospital, Shanghai Jiao Tong University School of Medicine, Shanghai, 200080, China

<sup>2</sup>Department of Cardiology, Zhongshan Hospital, Fudan University, Shanghai, 200032, China.

<sup>3</sup>Department of Cardiology, Shanghai Songjiang Center Hospital, Shanghai, 201600, China

<sup>4</sup>Bio-X Institutes, Key Laboratory for the Genetics of Developmental and Neuropsychiatric Disorders (Ministry of Education), Shanghai Jiao Tong University, Shanghai, 200030, China

<sup>+</sup>The authors contribute equally to this work

<sup>\*</sup>Corresponding author e-mails:

Professor Shaowen Liu, [shaowen.liu@hotmail.com](mailto:shaowen.liu@hotmail.com).

Professor Yongyong Shi, [shiyongyong@gmail.com](mailto:shiyongyong@gmail.com).

**Supplementary Table S1. The primers used for polymerase chain reaction**

| SNP ID     | Forward primer sequence | Reverse primer sequence | Extended primer sequence |
|------------|-------------------------|-------------------------|--------------------------|
| rs6790627  | ACGTTGGATGTCTTGGAG      | ACGTTGGATGTTAGTAAC      | GACAGAGGAGCAGAA          |
|            | CCCAACTTCTTC            | AGTGTGGCCCTC            | GAAA                     |
| rs4076737  | ACGTTGGATGAACAAGCT      | ACGTTGGATGATGAGATG      | GCATGTGTGTCTGATG         |
|            | GTGCCCCACTTGC           | CAGATACCACGG            | CG                       |
| rs12632942 | ACGTTGGATGTCTGGTTC      | ACGTTGGATGTGGACGAC      | cgaAGCACGGTGGACT         |
|            | TTCCAGGTCATC            | ACAAGCTCCTCT            | GCCC                     |
| rs6795970  | ACGTTGGATGGCACTGGA      | ACGTTGGATGAGGAAGCT      | CCTACCTCAGCAGGG          |
|            | ACATCTTCTGAG            | GACATACCTACC            | A                        |
| rs7374804  | ACGTTGGATGTGGTTCTC      | ACGTTGGATGTGCAGCTT      | gtTGAGCTGGTGGTGA         |
|            | AGCCTTGGAGC             | CTTCAGCAGGTC            | AA                       |
| rs7630989  | ACGTTGGATGCTAGTCAT      | ACGTTGGATGCCAGGAAA      | TATCTCGGCCAGGGG          |
|            | GGCAGTGTGTTC            | GACTCCATCATC            | A                        |
| rs62244070 | ACGTTGGATGCTTCACAA      | ACGTTGGATGAGGAGAAG      | gggagCGAGATGCTCCG        |
|            | AGCTTCCACTCC            | AAGTTCCAGGAG            | GAAGGAA                  |
| rs6798015  | ACGTTGGATGGATCTTGG      | ACGTTGGATGCTCCCCTG      | gaggCTGACGTGAAAG         |
|            | ACACTTGGTCTG            | TGTATGAAATTC            | TATTAGCA                 |
| rs7644332  | ACGTTGGATGATCTGGAG      | ACGTTGGATGCCATTGGT      | aagtcTCATGCTGTTTTG       |
|            | GCATCACCTTAG            | CTATGTGCTTAT            | GTACAA                   |
| rs4676596  | ACGTTGGATGCAGAAGGC      | ACGTTGGATGTCTCTGGA      | tgfTTTTTATCTTCTCT        |
|            | TGATTATTAAGTG           | GAATTTCCATC             | GGTGTCTC                 |

---

|            |                     |                     |                  |
|------------|---------------------|---------------------|------------------|
| rs10212338 | ACGTTGGATGCTGGTATAT | ACGTTGGATGTAACATGC  | tGAGACTCACACCATG |
|            | TCCTGCAGTGG         | AGGTCCCACCTTG       | AAC              |
| rs11716467 | ACGTTGGATGTTTGCCTCT | ACGTTGGATGGGCAGCAT  | TGCTCCATTCAAACAA |
|            | TCCCTGGATCG         | AGAGAGACTTTG        | GA               |
| rs11926158 | ACGTTGGATGTGGTCTGA  | ACGTTGGATGACTGGAAG  | ATCAAAAAATAAAAA  |
|            | AACCCCAATTAC        | AATTGTACATC         | GCAAATAAGAC      |
| rs9879472  | ACGTTGGATGATGGTATCC | ACGTTGGATGTCATTGGCT | GACAGGGAATAGTGA  |
|            | CTAGTCAGCAG         | TACTGCAAGGG         | GAAAAC           |
| rs9827941  | ACGTTGGATGGGGAAAGG  | ACGTTGGATGTCAAACCT  | CTTACAACATGAGAG  |
|            | AATGGTCCTTAG        | CCAACACCTG          | GTATCA           |

---

**Supplementary Table S2. Characteristics of 15 tag-SNPs in *SCN10A***

| No | SNP ID     | Chromosome<br>position <sup>a</sup> | Genic<br>location | Base<br>change | P <sup>b</sup>        | OR (95%CI)       | P <sup>c</sup> | Genotyping<br>rate (%) |
|----|------------|-------------------------------------|-------------------|----------------|-----------------------|------------------|----------------|------------------------|
| 1  | rs6790627  | 38707342                            | exon              | C/T            | 0.560                 | 1.10 (0.80~1.50) | 0.474          | 98.2                   |
| 2  | rs4076737  | 38723291                            | intron            | C/A            | 0.893                 | 0.97 (0.67~1.41) | 0.765          | 98.0                   |
| 3  | rs12632942 | 38723507                            | exon              | G/A            | 0.989                 | 1.00 (0.75~1.34) | 0.560          | 98.2                   |
| 4  | rs6795970  | 38725184                            | exon              | A/G            | 7.86×10 <sup>-5</sup> | 0.41 (0.26~0.65) | 0.072          | 99.6                   |
| 5  | rs7374804  | 38726843                            | exon              | C/T            | 0.623                 | 1.09 (0.78~1.51) | 0.863          | 97.8                   |
| 6  | rs7630989  | 38752449                            | exon              | G/A            | 0.439                 | 0.87 (0.61~1.24) | 0.105          | 98.6                   |
| 7  | rs62244070 | 38756680                            | exon              | T/C            | 0.824                 | 1.03 (0.77~1.38) | 0.382          | 98.0                   |
| 8  | rs6798015  | 38757345                            | intron            | C/T            | 0.706                 | 1.07 (0.74~1.56) | 0.069          | 98.0                   |
| 9  | rs7644332  | 38765609                            | intron            | A/G            | 0.333                 | 1.22 (0.81~1.83) | 0.786          | 97.8                   |
| 10 | rs4676596  | 38769206                            | intron            | A/G            | 0.616                 | 0.92 (0.66~1.27) | 0.285          | 98.0                   |
| 11 | rs10212338 | 38771159                            | intron            | A/G            | 0.662                 | 1.10 (0.71~1.71) | 0.345          | 97.8                   |
| 12 | rs11716467 | 38773345                            | intron            | G/A            | 0.876                 | 1.03 (0.72~1.48) | 0.071          | 98.0                   |
| 13 | rs11926158 | 38781824                            | intron            | G/C            | 0.548                 | 0.91 (0.68~1.23) | 0.791          | 97.8                   |
| 14 | rs9879472  | 38794803                            | 5'UTR             | G/C            | 0.599                 | 0.91 (0.63~1.30) | 0.773          | 97.6                   |
| 15 | rs9827941  | 38794968                            | 5'UTR             | A/T            | 0.588                 | 0.91 (0.66~1.27) | 0.814          | 98.0                   |

Note: a. chromosome position in the NCBI dbSNPs database (<http://www.ncbi.nlm.nih.gov/snp>); b. p value for difference in allele distributions between the AF recurrence group and no recurrence group using the Chi-square test; c. p value for the Hardy-Weinberg equilibrium test in the control group.

**Supplementary Table S3. Association between 15 tag-SNPs of *SCN10A* genotypes and AF recurrence**

| No | SNP ID     | Genotype | No<br>recurrence,<br>n% | AF<br>recurrence,<br>n% | P <sup>a</sup> | Additive model (adjusted) |                | Dominant model (adjusted) |                | Recessive model (adjusted) |                |
|----|------------|----------|-------------------------|-------------------------|----------------|---------------------------|----------------|---------------------------|----------------|----------------------------|----------------|
|    |            |          |                         |                         |                | OR (95%CI)                | P <sup>b</sup> | OR(95%CI)                 | P <sup>b</sup> | OR (95%CI)                 | P <sup>b</sup> |
| 1  | rs6790627  | TT       | 176 (47.3)              | 57 (47.1)               | 0.438          | 1.02 (0.73~1.44)          | 0.897          | 0.87 (0.55~1.35)          | 0.528          | 1.65 (0.80~3.39)           | 0.174          |
|    |            | TC       | 164 (44.1)              | 49 (40.5)               |                |                           |                |                           |                |                            |                |
|    |            | CC       | 32 (8.6)                | 15 (12.4)               |                |                           |                |                           |                |                            |                |
| 2  | rs4076737  | AA       | 242 (64.9)              | 77 (64.7)               | 0.919          | 1.03 (0.68~1.55)          | 0.888          | 1.11 (0.69~1.78)          | 0.666          | 0.60 (0.15~2.42)           | 0.475          |
|    |            | AC       | 118 (31.6)              | 39 (32.8)               |                |                           |                |                           |                |                            |                |
|    |            | CC       | 13 (3.5)                | 3 (2.5)                 |                |                           |                |                           |                |                            |                |
| 3  | rs12632942 | AA       | 121 (32.4)              | 37 (30.8)               | 0.835          | 1.03 (0.75~1.42)          | 0.832          | 1.11 (0.69~1.78)          | 0.679          | 0.97 (0.54~1.72)           | 0.905          |
|    |            | AG       | 178 (47.7)              | 61 (50.8)               |                |                           |                |                           |                |                            |                |
|    |            | GG       | 74 (19.8)               | 22 (18.3)               |                |                           |                |                           |                |                            |                |

|   |            |    |            |           |                       |                  |                       |                  |                       |                  |       |
|---|------------|----|------------|-----------|-----------------------|------------------|-----------------------|------------------|-----------------------|------------------|-------|
| 4 | rs6795970  | GG | 226 (59.6) | 99 (81.8) | $1.42 \times 10^{-5}$ | 0.36 (0.22~0.60) | $7.04 \times 10^{-5}$ | 0.29 (0.16~0.50) | $9.31 \times 10^{-6}$ | 0.82 (0.21~3.24) | 0.780 |
|   |            | GA | 141 (37.2) | 19 (15.7) |                       |                  |                       |                  |                       |                  |       |
|   |            | AA | 12 (3.2)   | 3 (2.5)   |                       |                  |                       |                  |                       |                  |       |
| 5 | rs7374804  | TT | 206 (55.7) | 65 (53.7) | 0.867                 | 1.05 (0.73~1.51) | 0.783                 | 1.00 (0.63~1.56) | 0.988                 | 1.37 (0.58~3.24) | 0.474 |
|   |            | TC | 141 (38.1) | 47 (38.8) |                       |                  |                       |                  |                       |                  |       |
|   |            | CC | 23 (6.2)   | 9 (7.4)   |                       |                  |                       |                  |                       |                  |       |
| 6 | rs7630989  | AA | 221 (59.1) | 76 (62.8) | 0.799                 | 0.80 (0.53~1.20) | 0.284                 | 0.77 (0.49~1.22) | 0.263                 | 0.84 (0.22~3.16) | 0.792 |
|   |            | AG | 140 (37.4) | 42 (34.7) |                       |                  |                       |                  |                       |                  |       |
|   |            | GG | 13 (3.5)   | 3 (2.5)   |                       |                  |                       |                  |                       |                  |       |
| 7 | rs62244070 | CC | 123 (33.2) | 37 (30.6) | 0.794                 | 1.05 (0.77~1.44) | 0.756                 | 1.16 (0.72~1.87) | 0.553                 | 0.96 (0.54~1.70) | 0.878 |
|   |            | CT | 174 (46.9) | 61 (50.4) |                       |                  |                       |                  |                       |                  |       |
|   |            | TT | 74 (19.9)  | 23 (19.0) |                       |                  |                       |                  |                       |                  |       |
| 8 | rs6798015  | TT | 257 (68.9) | 76 (63.9) | 0.131                 | 1.04 (0.70~1.55) | 0.857                 | 1.24 (0.78~1.98) | 0.368                 | 0.28 (0.06~1.34) | 0.112 |

|    |            |    |            |           |       |                  |       |                  |       |                  |       |
|----|------------|----|------------|-----------|-------|------------------|-------|------------------|-------|------------------|-------|
|    |            | TC | 99 (26.5)  | 41 (34.5) |       |                  |       |                  |       |                  |       |
|    |            | CC | 17 (4.6)   | 2 (1.7)   |       |                  |       |                  |       |                  |       |
| 9  | rs7644332  | GG | 278 (74.9) | 84 (70.0) | 0.495 | 1.15 (0.74~1.80) | 0.537 | 1.24 (0.75~2.04) | 0.397 | 0.66 (0.12~3.58) | 0.627 |
|    |            | GA | 87 (23.5)  | 34 (28.3) |       |                  |       |                  |       |                  |       |
|    |            | AA | 6 (1.6)    | 2 (1.7)   |       |                  |       |                  |       |                  |       |
| 10 | rs4676596  | GG | 193 (51.9) | 63 (52.5) | 0.640 | 0.97 (0.68~1.38) | 0.880 | 1.05 (0.67~1.65) | 0.830 | 0.73 (0.31~1.71) | 0.472 |
|    |            | GA | 144 (38.7) | 49 (40.8) |       |                  |       |                  |       |                  |       |
|    |            | AA | 35 (9.4)   | 8 (6.7)   |       |                  |       |                  |       |                  |       |
| 11 | rs10212338 | GG | 290 (78.4) | 91 (75.2) | 0.492 | 1.10 (0.68~1.78) | 0.689 | 1.20 (0.71~2.03) | 0.506 | 0.42 (0.04~4.08) | 0.451 |
|    |            | GA | 73 (19.7)  | 29 (24.0) |       |                  |       |                  |       |                  |       |
|    |            | AA | 7 (1.9)    | 1 (0.8)   |       |                  |       |                  |       |                  |       |
| 12 | rs11716467 | AA | 246 (66.0) | 76 (63.9) | 0.733 | 1.11 (0.75~1.63) | 0.608 | 1.20 (0.74~1.94) | 0.451 | 0.86 (0.30~2.52) | 0.788 |
|    |            | AG | 107 (28.7) | 38 (31.9) |       |                  |       |                  |       |                  |       |

|    |            |    |            |           |       |                  |       |                  |       |                  |       |
|----|------------|----|------------|-----------|-------|------------------|-------|------------------|-------|------------------|-------|
|    |            | GG | 20 (5.4)   | 5 (4.2)   |       |                  |       |                  |       |                  |       |
| 13 | rs11926158 | CC | 127 (34.2) | 40 (33.3) | 0.323 | 0.92 (0.66~1.27) | 0.594 | 1.08 (0.67~1.74) | 0.742 | 0.63 (0.33~1.20) | 0.160 |
|    |            | CG | 178 (48.0) | 65 (54.2) |       |                  |       |                  |       |                  |       |
|    |            | GG | 66 (17.8)  | 15 (12.5) |       |                  |       |                  |       |                  |       |
| 14 | rs9879472  | CC | 224 (60.5) | 77 (64.2) | 0.719 | 0.97 (0.66~1.43) | 0.884 | 0.91 (0.57~1.44) | 0.683 | 1.33 (0.48~3.69) | 0.585 |
|    |            | CG | 129 (34.9) | 37 (30.8) |       |                  |       |                  |       |                  |       |
|    |            | GG | 17 (4.6)   | 6 (5.0)   |       |                  |       |                  |       |                  |       |
| 15 | rs9827941  | TT | 189 (50.8) | 62 (51.7) | 0.615 | 0.97 (0.68~1.39) | 0.861 | 1.03 (0.66~1.62) | 0.893 | 0.73 (0.30~1.82) | 0.502 |
|    |            | TA | 151 (40.6) | 51 (42.5) |       |                  |       |                  |       |                  |       |
|    |            | AA | 32 (8.6)   | 7 (5.8)   |       |                  |       |                  |       |                  |       |

Note: AF: atrial fibrillation. a. P values were calculated from a case-control analysis using the Chi-square test. b. P values were calculated by a multivariable logistic regression analysis after adjustment for clinical variables including sex, age ( $\geq 60$  vs.  $< 60$  years old), AF subtype, history of AF ( $\geq 36$  vs.  $< 36$  months), LAD ( $\geq 40$  vs.  $< 40$  mm), LVEF, hypertension, coronary heart disease, rheumatic heart disease, cerebral embolism,



diabetes, smoking, alcohol, linear ablations, CFAEs ablations, cardioversion during ablation and previous use of amiodarone, BB, CCB and ACEI/ARB.

**Supplementary Table S4. Associations between SNPs of *SCN10A* haplotypes and**

**AF recurrence**

| Block   | Haplotype                                  | No         | AF         | P <sup>a</sup>   | P <sup>b</sup>   | OR (95% CI)      |
|---------|--------------------------------------------|------------|------------|------------------|------------------|------------------|
|         |                                            | recurrence | recurrence |                  |                  |                  |
|         |                                            | n (%)      | n (%)      |                  |                  |                  |
| Block 1 | rs4076737-rs12632942                       |            |            |                  |                  |                  |
|         | AG                                         | 331 (43.7) | 108 (43.9) | 0.968            |                  | 1.00 (referent)  |
|         | AA                                         | 283 (37.3) | 92 (37.4)  | 0.974            | 0.850            | 0.97 (0.69-1.35) |
|         | CA                                         | 143 (18.9) | 46 (18.7)  | 0.962            | 0.995            | 1.00 (0.66-1.51) |
|         | CG                                         | 1 (0.1)    | 0 (0.0)    | N/A <sup>c</sup> | N/A <sup>c</sup> | N/A <sup>c</sup> |
| Block 2 | rs7630989-rs62244070-rs6798015             |            |            |                  |                  |                  |
|         | ATT                                        | 326 (43.0) | 108 (43.9) | 0.790            |                  | 1.00 (referent)  |
|         | GCT                                        | 163 (21.5) | 47 (19.1)  | 0.435            | 0.390            | 0.84 (0.56-1.26) |
|         | ACC                                        | 134 (17.7) | 46 (18.7)  | 0.699            | 0.983            | 1.00 (0.66-1.53) |
|         | ACT                                        | 132 (17.4) | 44 (17.9)  | 0.920            | 0.931            | 1.02 (0.67-1.56) |
|         | GTT                                        | 3 (0.4)    | 1 (0.4)    | N/A <sup>c</sup> | N/A <sup>c</sup> | N/A <sup>c</sup> |
| Block 3 | rs4676596-rs10212338-rs11716467-rs11926158 |            |            |                  |                  |                  |
|         | GGAC                                       | 433 (57.1) | 142 (57.7) | 0.871            |                  | 1.00 (referent)  |
|         | AGGG                                       | 144 (19.0) | 46 (18.7)  | 0.899            | 0.940            | 0.99 (0.66-1.47) |
|         | GAAG                                       | 89 (11.7)  | 28 (11.4)  | 0.908            | 0.804            | 0.94 (0.58-1.53) |
|         | AGAG                                       | 66 (8.7)   | 15 (6.1)   | 0.198            | 0.231            | 0.69 (0.37-1.27) |
|         | Others                                     | 26 (3.4)   | 15 (6.1)   | N/A <sup>c</sup> | N/A <sup>c</sup> | N/A <sup>c</sup> |

|         |                     |            |       |                 |                  |
|---------|---------------------|------------|-------|-----------------|------------------|
| Block 4 | rs9879472-rs9827941 |            |       |                 |                  |
| CT      | 543 (71.6)          | 181 (73.6) | 0.556 | 1.00 (referent) |                  |
| GA      | 165 (21.8)          | 49 (19.9)  | 0.541 | 0.618           | 0.91 (0.62-1.32) |
| CA      | 50 (6.6)            | 16 (6.5)   | 0.956 | 0.978           | 1.01 (0.54-1.87) |

---

Note: a. P values for difference in haplotype frequency between AF recurrence and no recurrence group were calculated from a case-control analysis using the Chi-square test.

b. P values were calculated by a multivariable logistic regression analysis after adjustment.

c. N/A, not available because of the rarity (<3%) of haplotype.
